# Supplementary material
Source: Elsevier journal article supplement (https://www.sciencedirect.com/science/article/pii/S2341287921001848)
Supplement: mmc1 [file S2341287921001848:mmc1.docx]

(Supplementary files)

Estimado Corsino del Rey y Gonzalo Solís y revisores,

Muchas gracias por considerar nuestro trabajo para publicación en su revista.

Les remitimos el manuscrito con los cambios sugeridos marcados con control de

cambios.

Respecto a las anotaciones del revisor 1.

- se realizan los cambios pertinentes en el texto.

Respecto a las anotaciones del revisor 2.

- Se realizan los cambios pertinentes en el texto.

- Se añaden comentarios explicativos en el texto.

Estamos muy agradecidos por los comentarios recibidos. Agradecemos el tiempo

empleado en la lectura del trabajo y su interés en él.

Atentamente,

Núria Torre
